# Supplementary material for: Mechanism for the enhanced reactivity of 4-mercaptoprolyl thioesters in native chemical ligation
Source: Royal Society of Chemistry journal article supplement (doi:10.1039/c6ra13793h), 2016-01-01
Supplement: c6ra13793h1.pdf [file c6ra13793h1.pdf]

*Supporting Information*

**Mechanism for the Enhanced Reactivity of 4-Mercaptopropyl  
Thioesters in Native Chemical Ligation**

Muhammad Ishaq Ali Shah,<sup>a,†</sup> Zhe-Yuan Xu,<sup>b,†</sup> Lei Liu,<sup>a</sup> Yuan-Ye Jiang<sup>\*b</sup> and Jing  
Shi<sup>\*b</sup>

<sup>a</sup> *Department of Chemistry, Tsinghua University, Beijing 100084 (China).*

<sup>b</sup> *Collaborative Innovation Center of Chemistry for Energy Materials, CAS Key Laboratory of Urban Pollutant Conversion, Department of Chemistry, University of Science and Technology of China, Hefei 230026.*

**Author Email Addresses:** [shijing@ustc.edu.cn](mailto:shijing@ustc.edu.cn); [bdandy@mail.ustc.edu.cn](mailto:bdandy@mail.ustc.edu.cn)

## Table of Contents

|                                                                                       |    |
|---------------------------------------------------------------------------------------|----|
| NCIplot of <b>C2</b> , <b>TS1</b> , <b>TS3</b> and <b>TS7</b> .....                   | S3 |
| Potential energy scan of <b>CN1</b> .....                                             | S4 |
| Direct thiolate release on <b>C4</b> .....                                            | S5 |
| Orbital overlap of $n \rightarrow \pi^*$ interactions .....                           | S6 |
| Gibbs free energies of all intermediates and transition states.....                   | S7 |
| Cartesian coordinates of all located intermediates, transition states and MECPs ..... | S8 |

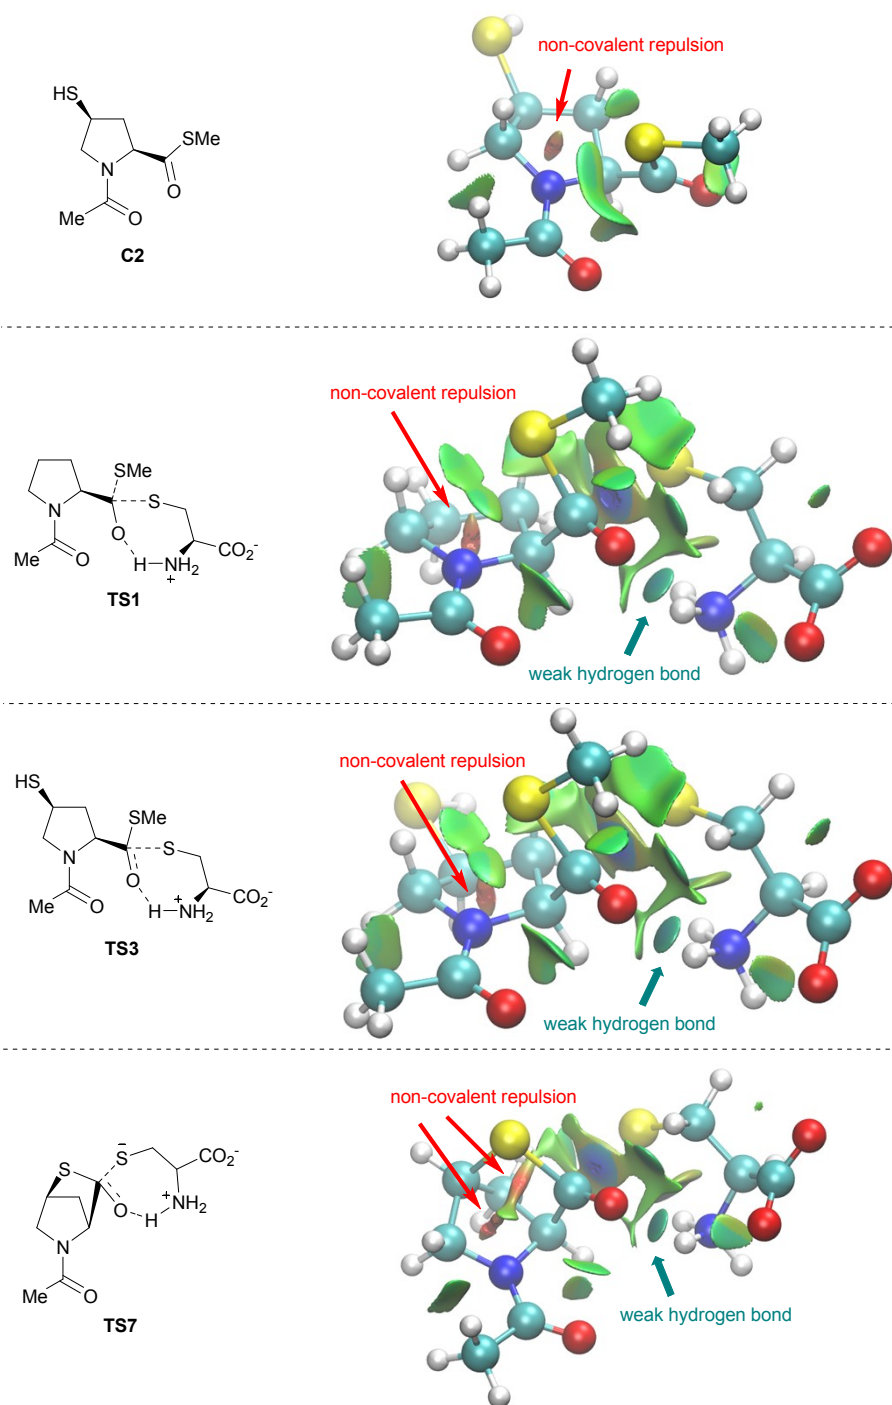

Fig. S1 NCIplot of C2, TS1, TS3 and TS7. Light green areas indicate weak van der Waals interactions. Blue areas indicate typical hydrogen bonds while the blue-green area here indicates a weak hydrogen bond. Red areas indicate relative strong non-covalent repulsion.

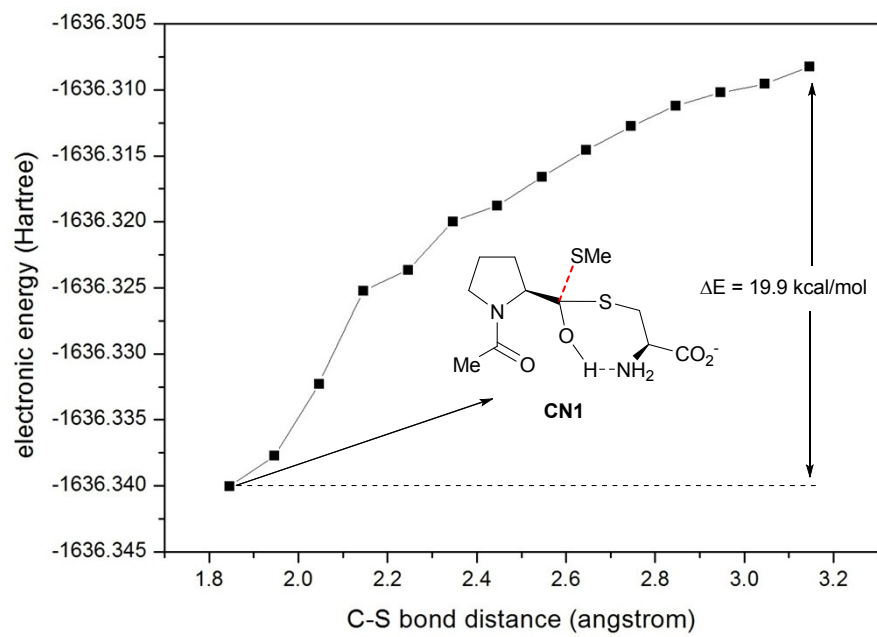

Fig. S2 Potential energy scan for the C-SMe bond cleavage on CN1.

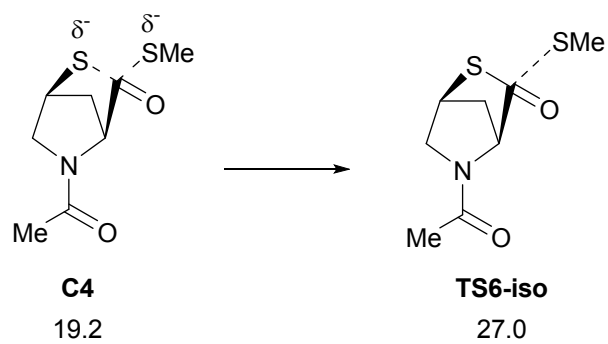

Scheme S1 Direct thiolate release on **C4** (free energy in kcal/mol).

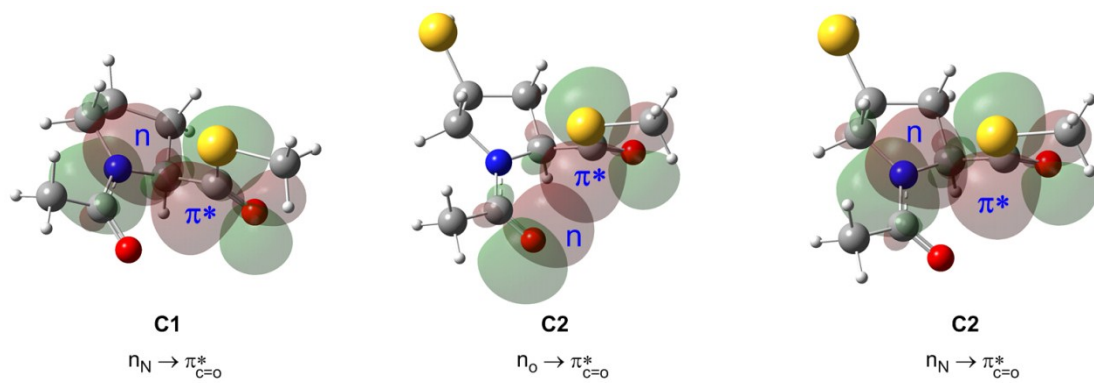

Fig. S3 Orbital overlaps of the  $n \rightarrow \pi^*$  interactions in **C1** and **C2**.

Table 1. Calculated Gibbs free energies corrections, solution-phase single point energies and solution-phase Gibbs free energies of all intermediates and transition states (in Hartree).<sup>a</sup>

| compounds                                   | Gibbs free energy corrections | solution-phase single point energies | solution-phase Gibbs free energies |
|---------------------------------------------|-------------------------------|--------------------------------------|------------------------------------|
| <b>N1</b>                                   | 0.076525                      | -721.9567939                         | -721.8772411                       |
| H <sub>2</sub> PO <sub>4</sub> <sup>-</sup> | 0.008859                      | -643.7987837                         | -643.7868969                       |
| <b>N2</b>                                   | 0.066793                      | -721.4876619                         | -721.4178411                       |
| H <sub>3</sub> PO <sub>4</sub>              | 0.018371                      | -644.2424875                         | -644.2210886                       |
| <b>C1</b>                                   | 0.16732                       | -916.0876542                         | -915.9173064                       |
| <b>TS1</b>                                  | 0.257715                      | -1637.570798                         | -1637.310055                       |
| <b>CN1</b>                                  | 0.259054                      | -1637.584111                         | -1637.322029                       |
| <b>TS2</b>                                  | 0.296301                      | -2281.82553                          | -2281.526201                       |
| MeSH                                        | 0.021885                      | -438.6836487                         | -438.6587358                       |
| <b>CN2</b>                                  | 0.225177                      | -1199.362015                         | -1199.13381                        |
| <b>C2</b>                                   | 0.164024                      | -1314.275411                         | -1314.108359                       |
| <b>TS3</b>                                  | 0.255366                      | -2035.759727                         | -2035.501333                       |
| <b>CN3</b>                                  | 0.255014                      | -2035.773074                         | -2035.515032                       |
| <b>TS4</b>                                  | 0.293339                      | -2680.015291                         | -2679.718924                       |
| <b>CN4</b>                                  | 0.221424                      | -1597.54972                          | -1597.325269                       |
| <b>C3</b>                                   | 0.154785                      | -1313.800097                         | -1313.642284                       |
| <b>TS5</b>                                  | 0.156836                      | -1313.787892                         | -1313.628028                       |
| <b>C4</b>                                   | 0.155946                      | -1313.788319                         | -1313.629345                       |
| <b>TS6</b>                                  | 0.194411                      | -1958.039228                         | -1957.841789                       |
| <b>TS6-iso</b>                              | 0.154759                      | -1313.774682                         | -1313.616896                       |
| <b>C5</b>                                   | 0.123156                      | -875.573511                          | -875.4473272                       |
| <b>TS7</b>                                  | 0.212776                      | -1597.063978                         | -1596.848174                       |
| <b>CN5</b>                                  | 0.212646                      | -1597.080926                         | -1596.865252                       |
| <b>TS8</b>                                  | 0.252613                      | -2241.327006                         | -2241.071365                       |

<sup>a</sup>Note that the free energy changes for the deprotonation of thiols **N1** and **C2** were calculated according to the experimental Pka but not the calculated solution-phase Gibbs free energies.

**Cartesian coordinates of intermediates, transition states and MECPs**

**N1**

|   |             |             |             |
|---|-------------|-------------|-------------|
| N | -0.16941100 | 1.60063500  | 0.06353700  |
| H | -0.02328100 | 1.67740100  | 1.08005600  |
| C | -0.26012500 | 0.17815000  | -0.35552800 |
| H | -0.13211400 | 0.16503700  | -1.44731900 |
| C | 0.80231000  | -0.67560700 | 0.30473800  |
| C | -1.70459000 | -0.30923300 | -0.05262100 |
| H | 0.66807500  | -0.69315500 | 1.39556400  |
| H | 0.67599600  | -1.70134300 | -0.06023300 |
| S | 2.51856300  | -0.20231500 | -0.09725400 |
| O | -2.56039100 | 0.59292100  | 0.06943500  |
| O | -1.86724500 | -1.53936400 | 0.00224300  |
| H | 0.58349600  | 2.11239200  | -0.41202900 |
| H | -1.08683600 | 2.03090900  | -0.13766300 |
| H | 2.59905500  | 0.85304300  | 0.73996500  |

**H<sub>2</sub>PO<sub>4</sub><sup>-</sup>**

|   |             |             |             |
|---|-------------|-------------|-------------|
| P | -0.00007100 | 0.09341200  | 0.12232200  |
| O | -1.27904500 | -0.36601800 | -0.79456000 |
| H | -1.51571000 | -1.28869500 | -0.61834300 |
| O | 1.27974600  | -0.36318600 | -0.79468700 |
| H | 1.51928400  | -1.28496900 | -0.61775000 |
| O | -0.00182500 | 1.59323600  | 0.12413700  |
| O | 0.00081000  | -0.71747200 | 1.39026800  |

**N2**

|   |             |             |             |
|---|-------------|-------------|-------------|
| N | 0.14837800  | 1.48054500  | -0.32623400 |
| H | -0.35239000 | 1.84211300  | 0.49782800  |
| C | -0.24375300 | 0.06856200  | -0.50772900 |
| H | -0.15410400 | -0.17625400 | -1.57266300 |
| C | 0.74423800  | -0.79533400 | 0.30448400  |
| C | -1.68097500 | -0.16063600 | -0.01541000 |
| H | 0.43096400  | -0.75502600 | 1.36369300  |
| H | 0.59915300  | -1.83415200 | -0.02709200 |
| S | 2.45998500  | -0.21391800 | 0.10121500  |
| O | -2.16824100 | 0.71930700  | 0.73142600  |
| O | -2.20328200 | -1.24168900 | -0.35508100 |
| H | 1.21200500  | 1.41428000  | -0.16638100 |
| H | -0.07892000 | 2.07140600  | -1.13000300 |

**H<sub>3</sub>PO<sub>4</sub>**

|   |             |             |             |
|---|-------------|-------------|-------------|
| P | -0.00025100 | -0.00030900 | 0.11143500  |
| O | -0.53342300 | -1.32658500 | -0.59309800 |
| H | -0.27034000 | -2.13914800 | -0.12791300 |
| O | 1.42259200  | 0.20169300  | -0.57761000 |
| H | 1.98828000  | 0.84073200  | -0.11118600 |
| O | -0.00831600 | -0.00646300 | 1.59250400  |
| O | -0.88023800 | 1.13138000  | -0.58529700 |
| H | -1.71910000 | 1.30284600  | -0.12442400 |

**C1**

|   |             |             |             |
|---|-------------|-------------|-------------|
| C | -2.05350200 | -0.62410200 | -0.86483500 |
| C | -0.28620000 | -0.81070900 | 0.79415800  |
| C | -0.55643900 | -2.18770300 | 0.15514000  |
| C | -1.99054600 | -2.06336200 | -0.36216400 |
| H | -3.07021500 | -0.21305200 | -0.85892500 |
| H | -1.64611300 | -0.53379800 | -1.88568800 |
| H | -0.47973000 | -0.81135900 | 1.87795100  |
| H | 0.13293900  | -2.34139200 | -0.68875900 |
| H | -0.41008200 | -3.00203600 | 0.87382600  |
| H | -2.70283400 | -2.19502200 | 0.46507300  |
| C | 1.17157600  | -0.40415900 | 0.63087000  |
| O | 2.00049400  | -0.60252200 | 1.48408300  |
| S | 1.57709400  | 0.28057100  | -0.96073600 |
| C | 3.36169500  | 0.44185900  | -0.73250400 |
| H | 3.81743900  | -0.54029300 | -0.55966400 |
| H | 3.75642600  | 0.87638500  | -1.65845200 |
| H | 3.57468100  | 1.11106700  | 0.10947600  |
| N | -1.20052100 | 0.07881200  | 0.09635400  |
| C | -1.21964400 | 1.39752200  | 0.39921000  |
| O | -0.47927600 | 1.84863300  | 1.27304200  |
| C | -2.17624000 | 2.25611300  | -0.38145200 |
| H | -2.03359100 | 2.11084900  | -1.46141300 |
| H | -3.21381200 | 1.98472100  | -0.13800900 |
| H | -2.00367700 | 3.30514100  | -0.11981400 |
| H | -2.22523000 | -2.79368400 | -1.14584600 |

**TS1**

|   |            |             |             |
|---|------------|-------------|-------------|
| C | 3.72892800 | -0.30428600 | -0.71997900 |
| C | 1.32869500 | 0.08336300  | -0.80158600 |
| C | 1.70384300 | -1.11969800 | -1.68580400 |
| C | 3.19325400 | -0.95254900 | -1.98934400 |
| H | 4.65615000 | 0.25734200  | -0.88089100 |
| H | 3.90998800 | -1.05375100 | 0.07049700  |



|   |             |             |             |   |             |             |             |
|---|-------------|-------------|-------------|---|-------------|-------------|-------------|
| H | 0.80419900  | 0.87633500  | -1.35630400 | C | -0.37391200 | -0.72240000 | -0.18944800 |
| H | 1.53022100  | -2.04285600 | -1.11556100 | S | -1.39665500 | -2.06120700 | -0.94425100 |
| H | 1.07388900  | -1.16186700 | -2.58066300 | C | -0.13357700 | -2.81220000 | -1.98995200 |
| H | 3.34262600  | -0.26829800 | -2.83764800 | H | 0.70333300  | -3.16397300 | -1.37059900 |
| C | 0.44653100  | -0.24114400 | 0.42367400  | H | -0.59960900 | -3.66850500 | -2.49394300 |
| S | 1.24696700  | -1.46812800 | 1.51593000  | H | 0.22408200  | -2.09861900 | -2.74205200 |
| C | -0.15096500 | -1.77495400 | 2.61169500  | N | -2.39327000 | 0.74692400  | 0.04994800  |
| H | -0.95765100 | -2.23311100 | 2.02207800  | C | -2.26901100 | 1.97333200  | -0.51414600 |
| H | 0.18674300  | -2.46979900 | 3.39055600  | O | -1.18986900 | 2.56359300  | -0.56104900 |
| H | -0.49212000 | -0.84080400 | 3.07469400  | C | -3.52097800 | 2.60468300  | -1.07317600 |
| N | 2.63358000  | 0.59088900  | -0.34413700 | H | -4.10642600 | 1.89427100  | -1.67058000 |
| C | 2.76153500  | 1.74755700  | 0.34475700  | H | -4.15593500 | 2.96395100  | -0.24959100 |
| O | 1.79845200  | 2.48399900  | 0.55642300  | H | -3.22686300 | 3.45959900  | -1.69115200 |
| C | 4.14741000  | 2.09899900  | 0.82529500  | O | 0.19171700  | 0.01770800  | -1.19408400 |
| H | 4.59722100  | 1.26444400  | 1.38032000  | S | 0.94064000  | -1.51606400 | 0.91703800  |
| H | 4.79983700  | 2.32742400  | -0.03007700 | C | 2.49363900  | -0.88659300 | 0.21095000  |
| H | 4.07731700  | 2.98182200  | 1.46928700  | C | 2.86750300  | 0.54193100  | 0.60396100  |
| O | -0.34740400 | 0.56308900  | 0.89857300  | H | 2.45669100  | -0.99021700 | -0.88340000 |
| S | -1.23385700 | -1.77002600 | -0.86160400 | H | 3.26295000  | -1.57259900 | 0.58711400  |
| C | -2.64722800 | -0.98132500 | -0.04331400 | N | 1.91472300  | 1.52265500  | 0.07618300  |
| C | -3.24462500 | 0.17942700  | -0.84023700 | H | 2.89914000  | 0.59131000  | 1.70392600  |
| H | -2.32068400 | -0.57836800 | 0.93176900  | C | 4.31399700  | 0.83793700  | 0.11793600  |
| H | -3.45723600 | -1.69750700 | 0.15308300  | H | 2.46320400  | 2.20053300  | -0.46015900 |
| N | -2.14035100 | 1.05859900  | -1.29112900 | H | 0.81802200  | 0.71376400  | -0.75984600 |
| H | -3.74781600 | -0.19587800 | -1.74234200 | H | 1.46311200  | 2.04125400  | 0.82892900  |
| C | -4.24096100 | 0.99568500  | 0.00076600  | O | 4.49582000  | 1.88775000  | -0.53757300 |
| H | -2.48788800 | 1.88830100  | -1.78095400 | O | 5.18249400  | -0.00368200 | 0.43404900  |
| H | -1.58936500 | 1.35275000  | -0.46524000 | H | -4.06481900 | -1.05477200 | 2.25577200  |
| H | -1.50083600 | 0.49168200  | -1.87279700 |   |             |             |             |
| O | -3.96842000 | 2.20199100  | 0.18811500  |   |             |             |             |
| O | -5.22473200 | 0.36123500  | 0.43330600  |   |             |             |             |
| H | 3.69139700  | -1.90276400 | -2.21901800 |   |             |             |             |

## CN1

|   |             |             |             |
|---|-------------|-------------|-------------|
| C | -3.65816600 | 0.12482400  | 0.44908000  |
| C | -1.26854600 | 0.12128700  | 0.75215000  |
| C | -1.92006200 | -0.68976500 | 1.89562900  |
| C | -3.39263400 | -0.26343300 | 1.90123100  |
| H | -4.49676500 | 0.81931000  | 0.33759000  |
| H | -3.85826000 | -0.76179600 | -0.17418400 |
| H | -0.61890300 | 0.91977500  | 1.13813600  |
| H | -1.83539000 | -1.76587200 | 1.68757000  |
| H | -1.41976100 | -0.49894800 | 2.85227500  |
| H | -3.53255000 | 0.62024300  | 2.54066500  |

## TS2

|   |             |             |             |
|---|-------------|-------------|-------------|
| C | 3.82158300  | -1.65286200 | 0.04811600  |
| C | 2.18949100  | -0.17709100 | -0.93571200 |
| C | 1.97683400  | -1.57618900 | -1.54068300 |
| C | 3.25012800  | -2.36070800 | -1.18170900 |
| H | 4.91333800  | -1.73019400 | 0.10020800  |
| H | 3.38728000  | -2.04690100 | 0.97751300  |
| H | 2.33794900  | 0.58532500  | -1.72059200 |
| H | 1.08242100  | -2.03962600 | -1.10376500 |
| H | 1.82649300  | -1.51872800 | -2.62602900 |
| H | 3.97494400  | -2.29521600 | -2.00539200 |
| C | 1.00861200  | 0.39187000  | -0.14001800 |
| S | 0.69231700  | -1.66688600 | 1.43991900  |
| C | -0.16802700 | -0.64157000 | 2.66498100  |
| H | -1.25280600 | -0.63312600 | 2.49004200  |

|   |             |             |             |   |             |             |             |
|---|-------------|-------------|-------------|---|-------------|-------------|-------------|
| H | 0.01607600  | -1.01122800 | 3.68398700  | C | 2.94377200  | -1.76601000 | -0.11173400 |
| H | 0.20956600  | 0.39157200  | 2.60225800  | C | 4.16908100  | -0.88492700 | 0.13188600  |
| N | 3.40943700  | -0.26202600 | -0.15230900 | H | 4.20352200  | 1.30608900  | 0.33175000  |
| C | 4.16421500  | 0.83774100  | 0.07567700  | H | 3.31629800  | 0.45960500  | 1.62931800  |
| O | 3.82714600  | 1.95088500  | -0.33099500 | H | 2.03825900  | -0.81895400 | -1.87840900 |
| C | 5.44757200  | 0.63480300  | 0.84148100  | H | 2.53295300  | -2.11219300 | 0.84940900  |
| H | 5.29011500  | 0.00997500  | 1.73024300  | H | 3.13880200  | -2.64266200 | -0.73954400 |
| H | 6.19066500  | 0.13520900  | 0.20212700  | H | 4.73160000  | -0.75637700 | -0.80399700 |
| H | 5.83423400  | 1.61615800  | 1.13579300  | C | 0.50235900  | -1.16357200 | -0.48442500 |
| O | 1.13638800  | 1.28273900  | 0.68988400  | O | -0.20601700 | -1.71867300 | -1.28212000 |
| S | -0.52237900 | 0.26070100  | -1.12984500 | N | 2.32610300  | 0.50159700  | -0.24210500 |
| C | -1.59997000 | 1.38433800  | -0.19673400 | C | 1.53323300  | 1.57477700  | -0.40854500 |
| C | -1.56523700 | 2.82639800  | -0.66989300 | O | 0.49050900  | 1.48846800  | -1.07467200 |
| H | -1.33264500 | 1.30978200  | 0.86733800  | C | 1.95230700  | 2.84523500  | 0.27087700  |
| H | -2.62292000 | 1.00807400  | -0.30930900 | H | 2.01599000  | 2.68080400  | 1.35669600  |
| N | -0.20924600 | 3.42720100  | -0.54770800 | H | 2.94377200  | 3.16556200  | -0.07819200 |
| H | -1.85924000 | 2.88378000  | -1.72641200 | H | 1.21588800  | 3.62590200  | 0.05479500  |
| C | -2.55881300 | 3.71118300  | 0.13414000  | S | -0.05330000 | -0.76383600 | 1.17443100  |
| H | -0.36465600 | 4.36956300  | -0.14139300 | C | -1.84096200 | -0.96379700 | 0.90366000  |
| H | 0.39011600  | 2.86679500  | 0.08816500  | C | -2.42537200 | 0.04006200  | -0.07681900 |
| H | 0.27551100  | 3.50419100  | -1.44815800 | H | -2.29741900 | -0.85548700 | 1.89788500  |
| O | -2.10704200 | 4.79903500  | 0.55372900  | H | -2.04627000 | -1.97512800 | 0.53623300  |
| O | -3.70679900 | 3.25402600  | 0.26055800  | N | -2.04525500 | 1.44005500  | 0.23500100  |
| H | -0.70896000 | -2.39190800 | 0.50435100  | H | -2.05111500 | -0.16265500 | -1.08991700 |
| O | -1.47486600 | -2.87830200 | -0.07407900 | C | -3.97473600 | -0.04672500 | -0.14130400 |
| P | -2.89093600 | -2.22322400 | -0.03780000 | H | -2.03133800 | 1.61666700  | 1.24799100  |
| O | -3.17517500 | -1.69363300 | -1.53036900 | H | -1.12044000 | 1.68378500  | -0.17163400 |
| O | -3.81456600 | -3.53299900 | 0.07575900  | H | -2.79398500 | 2.03167200  | -0.16243300 |
| O | -3.16244400 | -1.18338700 | 0.99523000  | O | -4.57022100 | 1.04296900  | -0.27574600 |
| H | -3.61042400 | -0.82607900 | -1.53464600 | O | -4.45946000 | -1.18950000 | -0.08631800 |
| H | -4.76221100 | -3.32858300 | 0.01294800  | H | 4.84506400  | -1.29407500 | 0.89191700  |
| H | 3.04938800  | -3.42215100 | -0.98894900 |   |             |             |             |

### MeSH

|   |             |             |             |
|---|-------------|-------------|-------------|
| S | -0.66148100 | -0.08731200 | 0.00000300  |
| C | 1.15305000  | 0.01931200  | 0.00000700  |
| H | 1.52239800  | 0.52782400  | 0.89846700  |
| H | 1.52537400  | -1.01270100 | -0.00009900 |
| H | 1.52239100  | 0.52790600  | -0.89841100 |
| H | -0.90476700 | 1.23808900  | -0.00004300 |

### CN2

|   |            |             |             |
|---|------------|-------------|-------------|
| C | 3.55829400 | 0.44751900  | 0.55400700  |
| C | 1.94982200 | -0.80070500 | -0.78130100 |

### C2

|   |             |             |             |
|---|-------------|-------------|-------------|
| C | -1.57037400 | 0.85571000  | -0.42204900 |
| C | 0.04961800  | -0.16623100 | 1.07704000  |
| C | -1.11020200 | -1.14408300 | 0.80958500  |
| C | -2.26128300 | -0.21713100 | 0.41961100  |
| H | -2.12309400 | 1.80279800  | -0.42873000 |
| H | -1.43400300 | 0.51697400  | -1.46462600 |
| H | 0.12856200  | 0.10467300  | 2.14069700  |
| H | -0.86572100 | -1.79239000 | -0.04528800 |
| H | -1.33228800 | -1.77306600 | 1.67937700  |
| H | -2.68550500 | 0.25385700  | 1.31635100  |
| S | -3.60268700 | -1.00239500 | -0.52636300 |

|   |             |             |             |
|---|-------------|-------------|-------------|
| H | -4.08034900 | -1.74469300 | 0.49289800  |
| C | 1.39268300  | -0.77750700 | 0.69556100  |
| O | 2.11678100  | -1.30766500 | 1.50038800  |
| S | 1.75143500  | -0.74114100 | -1.04677900 |
| C | 3.31195100  | -1.64925900 | -1.01261400 |
| H | 3.16166500  | -2.65713400 | -0.60800500 |
| H | 3.66066900  | -1.71209600 | -2.05016500 |
| H | 4.04840300  | -1.10680900 | -0.40779800 |
| N | -0.28679500 | 0.99004200  | 0.26012700  |
| C | 0.55943600  | 2.04865700  | 0.21041200  |
| O | 1.59137300  | 2.04693200  | 0.87830800  |
| C | 0.17223600  | 3.18017800  | -0.69950400 |
| H | 0.00447000  | 2.80675400  | -1.71980300 |
| H | -0.76071500 | 3.64773300  | -0.35317500 |
| H | 0.97585900  | 3.92355000  | -0.70017400 |

### TS3

|   |             |             |             |
|---|-------------|-------------|-------------|
| C | 3.39219800  | 0.26913200  | -0.28068000 |
| C | 0.98391300  | 0.16683900  | -0.62733500 |
| C | 1.59666600  | -1.24082000 | -0.71348100 |
| C | 3.06881900  | -1.01069000 | -1.04491200 |
| H | 4.25777200  | 0.79936300  | -0.69372700 |
| H | 3.58354100  | 0.05553500  | 0.78716700  |
| H | 0.44473500  | 0.45752400  | -1.54183600 |
| H | 1.51222600  | -1.73085000 | 0.26670200  |
| H | 1.08103200  | -1.86456400 | -1.45123500 |
| H | 3.19837100  | -0.82151300 | -2.11919300 |
| S | 4.19271100  | -2.35566200 | -0.54911900 |
| H | 3.67869600  | -3.28393200 | -1.38160400 |
| C | 0.00371400  | 0.39127100  | 0.54551600  |
| S | 0.82076100  | 0.11749400  | 2.15273300  |
| C | -0.64851300 | 0.15922500  | 3.19644400  |
| H | -1.27694700 | -0.70684400 | 2.94520900  |
| H | -0.31275100 | 0.09408800  | 4.23867300  |
| H | -1.19985900 | 1.09559700  | 3.04630600  |
| N | 2.16284600  | 1.03475300  | -0.45524500 |
| C | 2.07408400  | 2.38686700  | -0.45513000 |
| O | 1.01097800  | 2.95887800  | -0.68571200 |
| C | 3.34348000  | 3.14803800  | -0.16953100 |
| H | 3.81915600  | 2.78653400  | 0.75253600  |
| H | 4.05990700  | 3.02030300  | -0.99396100 |
| H | 3.09559200  | 4.20993800  | -0.07028000 |
| O | -0.95771900 | 1.14564300  | 0.46819000  |
| S | -1.26406400 | -1.90386700 | 0.27292400  |

|   |             |             |             |
|---|-------------|-------------|-------------|
| C | -2.87388000 | -1.09422600 | 0.47530500  |
| C | -3.52141400 | -0.68956900 | -0.84841700 |
| H | -2.74649700 | -0.17686000 | 1.07724600  |
| H | -3.58888600 | -1.73626100 | 1.00785900  |
| N | -2.51371300 | 0.02236400  | -1.66990100 |
| H | -3.82185300 | -1.58394500 | -1.41260200 |
| C | -4.74839900 | 0.21653400  | -0.64293800 |
| H | -2.91959300 | 0.38555000  | -2.53767200 |
| H | -2.12525800 | 0.80848600  | -1.11921700 |
| H | -1.72378300 | -0.62231000 | -1.83706200 |
| O | -4.72384100 | 1.33596300  | -1.19989700 |
| O | -5.65117900 | -0.25657400 | 0.07730100  |

### CN3

|   |             |             |             |
|---|-------------|-------------|-------------|
| C | 3.19279600  | 0.64685900  | 0.11984100  |
| C | 0.89410900  | 0.25623000  | -0.47782200 |
| C | 1.79261500  | -0.68456200 | -1.31072300 |
| C | 3.18970700  | -0.06127400 | -1.23557300 |
| H | 3.93758500  | 1.44721300  | 0.17366600  |
| H | 3.38297700  | -0.06761000 | 0.93938200  |
| H | 0.22811700  | 0.85589400  | -1.11385700 |
| H | 1.81556200  | -1.68859600 | -0.86351800 |
| H | 1.43762700  | -0.78143400 | -2.34350600 |
| H | 3.31037900  | 0.69712500  | -2.02058000 |
| S | 4.57432600  | -1.24032000 | -1.34157900 |
| H | 4.34862000  | -1.61513700 | -2.61700100 |
| C | -0.03239800 | -0.48241500 | 0.51951100  |
| S | 1.00254200  | -1.48258500 | 1.67491000  |
| C | -0.31696500 | -2.13926800 | 2.71479100  |
| H | -1.03155100 | -2.70143400 | 2.09734600  |
| H | 0.15222300  | -2.81838000 | 3.43799400  |
| H | -0.82886900 | -1.33146600 | 3.25148800  |
| N | 1.83059400  | 1.16408900  | 0.19204500  |
| C | 1.49595200  | 2.45427900  | 0.45421100  |
| O | 0.37018600  | 2.89090000  | 0.22446800  |
| C | 2.57349500  | 3.33760500  | 1.03185800  |
| H | 3.09546300  | 2.84986600  | 1.86516800  |
| H | 3.31670900  | 3.57791500  | 0.25717000  |
| H | 2.10614600  | 4.26675200  | 1.37414500  |
| O | -0.80883200 | 0.37216100  | 1.25506200  |
| S | -1.08092800 | -1.65947600 | -0.52735900 |
| C | -2.77627800 | -1.11342600 | -0.16128400 |
| C | -3.24462200 | 0.13664000  | -0.90573900 |
| H | -2.87808100 | -0.97746400 | 0.92544400  |

|   |             |             |             |
|---|-------------|-------------|-------------|
| H | -3.40794300 | -1.96158200 | -0.45438800 |
| N | -2.48717200 | 1.32706400  | -0.50863400 |
| H | -3.13062700 | -0.05093400 | -1.98497300 |
| C | -4.76725100 | 0.32516600  | -0.65614600 |
| H | -3.17757900 | 2.01934400  | -0.20422000 |
| H | -1.44041100 | 0.86797400  | 0.60512300  |
| H | -1.99307700 | 1.73232900  | -1.30315300 |
| O | -5.14654100 | 1.44218600  | -0.24034200 |
| O | -5.48846600 | -0.66716600 | -0.89652600 |

### TS4

|   |             |             |             |
|---|-------------|-------------|-------------|
| C | -3.82098200 | -0.12599600 | 0.25963800  |
| C | -1.81538600 | -0.86482800 | -0.85747900 |
| C | -2.14102800 | 0.54908100  | -1.36488200 |
| C | -3.60212100 | 0.78101500  | -0.95587100 |
| H | -4.86603300 | -0.44407400 | 0.34293700  |
| H | -3.51498000 | 0.37635600  | 1.19035900  |
| H | -1.73569600 | -1.58642200 | -1.68932200 |
| H | -1.48722400 | 1.28576000  | -0.88054500 |
| H | -2.01072100 | 0.63291300  | -2.45125800 |
| H | -4.27281600 | 0.45357600  | -1.76039800 |
| S | -4.02100700 | 2.50336000  | -0.52875200 |
| H | -4.03567700 | 2.97021700  | -1.79342500 |
| C | -0.46341400 | -1.01408200 | -0.15056700 |
| S | -0.89395000 | 0.87631800  | 1.64152500  |
| C | 0.38173500  | 0.17838400  | 2.72717100  |
| H | 1.36752400  | 0.62314600  | 2.53246800  |
| H | 0.13134400  | 0.34812700  | 3.78434800  |
| H | 0.44481300  | -0.90931900 | 2.56214000  |
| N | -2.94305600 | -1.25609800 | -0.02636800 |
| C | -3.25018400 | -2.56533700 | 0.14943600  |
| O | -2.55987200 | -3.45887800 | -0.33813200 |
| C | -4.48409000 | -2.87128000 | 0.95969500  |
| H | -4.51079800 | -2.28618300 | 1.88822700  |
| H | -5.38524900 | -2.62762800 | 0.37757700  |
| H | -4.48909100 | -3.94175900 | 1.19017000  |
| O | -0.20559100 | -1.94680200 | 0.59797700  |
| S | 0.84858500  | -0.22575600 | -1.13903400 |
| C | 2.32113000  | -0.84310500 | -0.27562200 |
| C | 2.88470300  | -2.14736800 | -0.81146600 |
| H | 2.07966800  | -0.92873600 | 0.79376800  |
| H | 3.09051600  | -0.06960900 | -0.38191500 |
| N | 1.95186500  | -3.28933200 | -0.61101200 |
| H | 3.09111100  | -2.05842900 | -1.88571400 |

|   |             |             |             |
|---|-------------|-------------|-------------|
| C | 4.22416800  | -2.49254700 | -0.09920200 |
| H | 2.51478500  | -4.00259400 | -0.10454300 |
| H | 1.13113800  | -3.01191400 | -0.03726700 |
| H | 1.61024600  | -3.68765400 | -1.49178800 |
| O | 4.29430400  | -3.63049200 | 0.41465900  |
| O | 5.08745100  | -1.60009000 | -0.11550700 |
| H | -0.00980400 | 2.18473500  | 0.72469700  |
| O | 0.42584300  | 2.98062300  | 0.14170300  |
| P | 1.98516900  | 3.00959200  | 0.08710100  |
| O | 2.38512500  | 2.76194300  | -1.45184700 |
| O | 2.25542100  | 4.57924800  | 0.29505000  |
| O | 2.73788200  | 2.12104800  | 1.01761400  |
| H | 3.11138300  | 2.12442100  | -1.54308400 |
| H | 3.19660000  | 4.81002500  | 0.23063600  |

### CN4

|   |             |             |             |
|---|-------------|-------------|-------------|
| C | 2.91674400  | -0.91771200 | -0.27635000 |
| C | 1.37535700  | 0.37764600  | 1.09493700  |
| C | 2.51971300  | 1.27412400  | 0.59323100  |
| C | 3.64706800  | 0.27525200  | 0.33850100  |
| H | 3.45042600  | -1.86319600 | -0.12224400 |
| H | 2.75533100  | -0.77188000 | -1.35882700 |
| H | 1.38483300  | 0.27231600  | 2.19007000  |
| H | 2.23836400  | 1.75084000  | -0.35864500 |
| H | 2.78158900  | 2.05507100  | 1.31629600  |
| H | 4.09751900  | -0.03263000 | 1.29149500  |
| S | 4.96190300  | 0.85916900  | -0.77525300 |
| H | 5.47519100  | 1.76798200  | 0.07823600  |
| C | 0.00396100  | 0.94365500  | 0.74808900  |
| O | -0.70219500 | 1.48083200  | 1.55916300  |
| N | 1.64156700  | -0.90166600 | 0.44213300  |
| C | 0.71673500  | -1.88186100 | 0.43343500  |
| O | -0.35614200 | -1.73190200 | 1.03371900  |
| C | 1.04557200  | -3.12185600 | -0.34273200 |
| H | 1.24936300  | -2.86546300 | -1.39267300 |
| H | 1.94625700  | -3.60086500 | 0.06679200  |
| H | 0.20099200  | -3.81580900 | -0.28472600 |
| S | -0.44960800 | 0.80342700  | -0.98105000 |
| C | -2.22457800 | 1.16589300  | -0.82123500 |
| C | -2.98985300 | 0.12600400  | -0.01986100 |
| H | -2.59929700 | 1.21980200  | -1.85361900 |
| H | -2.36140300 | 2.14646800  | -0.35273100 |
| N | -2.72306000 | -1.26031400 | -0.47533000 |
| H | -2.69117600 | 0.16969200  | 1.03673300  |

|   |             |             |             |
|---|-------------|-------------|-------------|
| C | -4.52360800 | 0.37138000  | -0.06483800 |
| H | -2.59241600 | -1.30868600 | -1.49410500 |
| H | -1.88821900 | -1.66369300 | -0.00663400 |
| H | -3.57685100 | -1.79958900 | -0.25056300 |
| O | -5.23107100 | -0.65734500 | -0.10634300 |
| O | -4.88802300 | 1.55801700  | -0.02037400 |

### C3

|   |             |             |             |
|---|-------------|-------------|-------------|
| C | -1.59338400 | 0.81195100  | -0.44265000 |
| C | 0.01926100  | -0.16944100 | 1.07729100  |
| C | -1.13968600 | -1.14915200 | 0.80165800  |
| C | -2.31595300 | -0.25060000 | 0.38892100  |
| H | -2.14812800 | 1.75708700  | -0.50002400 |
| H | -1.43545700 | 0.43023500  | -1.46654800 |
| H | 0.09541300  | 0.10154900  | 2.14175500  |
| H | -0.89388500 | -1.79281700 | -0.05745000 |
| H | -1.35930200 | -1.78895600 | 1.66522000  |
| H | -2.67030600 | 0.25773500  | 1.30544600  |
| S | -3.67263800 | -1.08650200 | -0.46937600 |
| C | 1.36258300  | -0.77246000 | 0.70073200  |
| O | 2.08882000  | -1.31065800 | 1.50039500  |
| S | 1.72854600  | -0.72760000 | -1.04361200 |
| C | 3.28826700  | -1.63705000 | -1.00855100 |
| H | 3.13745400  | -2.64617000 | -0.60696800 |
| H | 3.64011000  | -1.69826000 | -2.04523400 |
| H | 4.02514000  | -1.09828000 | -0.40079700 |
| N | -0.31726200 | 0.98611900  | 0.25743400  |
| C | 0.52152900  | 2.04285900  | 0.21011800  |
| O | 1.54994100  | 2.06200100  | 0.89031700  |
| C | 0.14034700  | 3.16681900  | -0.71477800 |
| H | -0.01125400 | 2.78513300  | -1.73456300 |
| H | -0.80047600 | 3.63156100  | -0.38669000 |
| H | 0.93914000  | 3.91569300  | -0.71051400 |

### TS5

|   |             |             |             |
|---|-------------|-------------|-------------|
| C | 1.72560600  | 1.44858500  | -0.08133600 |
| C | 0.24944000  | -0.13154900 | 0.97029600  |
| C | -0.01571700 | 1.26605900  | 1.51562100  |
| C | 0.35419400  | 2.04549500  | 0.24947200  |
| H | 2.52990900  | 1.92015900  | 0.50941000  |
| H | 1.96537500  | 1.54061000  | -1.14838800 |
| H | 0.30178800  | -0.93438800 | 1.71965700  |
| H | -1.05737700 | 1.41255100  | 1.82223600  |
| H | 0.66018100  | 1.49176200  | 2.35506300  |

|   |             |             |             |
|---|-------------|-------------|-------------|
| H | 0.38875100  | 3.13505300  | 0.37379100  |
| S | -0.86927400 | 1.54173400  | -1.01410700 |
| C | -0.80331900 | -0.52348000 | -0.09776800 |
| O | -0.54234400 | -1.37803000 | -0.96138700 |
| N | 1.54332600  | 0.04640400  | 0.31783800  |
| C | 2.37238800  | -0.97610500 | 0.03726900  |
| O | 2.13823000  | -2.13349800 | 0.39521700  |
| C | 3.62223600  | -0.61646300 | -0.72679100 |
| H | 3.35893100  | -0.31175400 | -1.75042900 |
| H | 4.14943500  | 0.22327200  | -0.25344300 |
| H | 4.27764400  | -1.49290800 | -0.76783600 |
| S | -2.47697500 | -0.67189000 | 0.75495400  |
| C | -3.44797200 | -0.89730900 | -0.74511200 |
| H | -4.47948900 | -1.14143400 | -0.46184600 |
| H | -3.43895800 | 0.03210400  | -1.33508600 |
| H | -3.02771800 | -1.71652300 | -1.34209400 |

### C4

|   |             |             |             |
|---|-------------|-------------|-------------|
| C | 1.71925300  | 1.45251600  | -0.09629600 |
| C | 0.25001600  | -0.12338500 | 0.96806800  |
| C | -0.01449900 | 1.27504200  | 1.51147600  |
| C | 0.34463900  | 2.04154500  | 0.23450000  |
| H | 2.52148200  | 1.93954100  | 0.48431400  |
| H | 1.95377700  | 1.53302700  | -1.16552300 |
| H | 0.29402000  | -0.93136400 | 1.71142700  |
| H | -1.05444700 | 1.42102100  | 1.82386500  |
| H | 0.66769600  | 1.51089600  | 2.34269400  |
| H | 0.36190800  | 3.13362500  | 0.33400100  |
| S | -0.88081800 | 1.49414500  | -1.01035100 |
| C | -0.79753600 | -0.49249800 | -0.11849400 |
| O | -0.53550500 | -1.37075100 | -0.96817500 |
| N | 1.54819800  | 0.05437300  | 0.32208100  |
| C | 2.38012300  | -0.96704200 | 0.04603300  |
| O | 2.15298100  | -2.12241200 | 0.41488800  |
| C | 3.62559800  | -0.60812500 | -0.72547400 |
| H | 3.35740200  | -0.31856000 | -1.75229100 |
| H | 4.14795700  | 0.24136900  | -0.26433600 |
| H | 4.28720800  | -1.48029300 | -0.75728500 |
| S | -2.47305700 | -0.66993700 | 0.76069400  |
| C | -3.45422800 | -0.88953400 | -0.73372000 |
| H | -4.47990600 | -1.15454600 | -0.44753000 |
| H | -3.46759400 | 0.04551900  | -1.31494100 |
| H | -3.02490200 | -1.69397400 | -1.34469800 |

**TS6**

|   |             |             |             |
|---|-------------|-------------|-------------|
| C | 2.89847700  | -1.79215100 | 0.21634600  |
| C | 1.86019000  | 0.06054200  | -0.91561300 |
| C | 1.03424400  | -1.20085600 | -1.11973600 |
| C | 1.36816300  | -1.83256300 | 0.23465600  |
| H | 3.30821500  | -2.63470600 | -0.36403700 |
| H | 3.33075900  | -1.80697400 | 1.22494200  |
| H | 1.99065700  | 0.74354500  | -1.76087100 |
| H | -0.03250500 | -1.01049500 | -1.26801300 |
| H | 1.42938300  | -1.80672700 | -1.94742600 |
| H | 0.94402600  | -2.82265600 | 0.43152500  |
| S | 0.75787100  | -0.60881600 | 1.46919200  |
| C | 1.29960500  | 0.79499800  | 0.32362700  |
| O | 1.76988700  | 1.81804000  | 0.79663900  |
| N | 3.13878100  | -0.51012800 | -0.46569900 |
| C | 4.28452000  | 0.20685400  | -0.43648800 |
| O | 4.35267200  | 1.33707000  | -0.91917500 |
| C | 5.46787100  | -0.46748000 | 0.20682700  |
| H | 5.31780600  | -0.50971300 | 1.29606800  |
| H | 5.58804700  | -1.49690000 | -0.15665600 |
| H | 6.36894600  | 0.11584300  | -0.00994400 |
| S | -0.80044400 | 1.50604700  | -0.63399300 |
| C | -1.26143300 | 2.20400000  | 0.97531200  |
| H | -2.08868800 | 2.91910700  | 0.87158800  |
| H | -1.57292600 | 1.41090500  | 1.67334800  |
| H | -0.39390500 | 2.72879500  | 1.40439400  |
| H | -1.77991700 | -0.06648900 | -0.30174300 |
| O | -2.44210600 | -0.84860700 | -0.06156200 |
| P | -3.92248200 | -0.32908700 | -0.07036100 |
| O | -4.18201300 | 0.02863400  | -1.61516300 |
| O | -4.71586200 | -1.69378600 | 0.20650500  |
| O | -4.29975100 | 0.78043600  | 0.84688200  |
| H | -4.86450300 | 0.71104300  | -1.72383400 |
| H | -5.57091700 | -1.53743800 | 0.64020700  |

**C5**

|   |             |             |             |
|---|-------------|-------------|-------------|
| C | -0.20829800 | -1.64114300 | -0.13739000 |
| C | 0.26584700  | 0.36491700  | 1.10132300  |
| C | 1.27846600  | -0.71287600 | 1.46101800  |
| C | 1.28437100  | -1.38468200 | 0.08378700  |
| H | -0.52819700 | -2.54161900 | 0.40846700  |
| H | -0.46793600 | -1.75334500 | -1.19700400 |
| H | -0.11762500 | 1.01527200  | 1.89238600  |
| H | 2.25169300  | -0.30791100 | 1.76160900  |

|   |             |             |             |
|---|-------------|-------------|-------------|
| H | 0.88990000  | -1.38933600 | 2.23427500  |
| H | 1.92997600  | -2.25878000 | -0.04378700 |
| S | 1.82065300  | -0.02676800 | -1.04974700 |
| C | 0.93695300  | 1.16286600  | -0.02297500 |
| O | 0.86630700  | 2.34014000  | -0.23741900 |
| N | -0.78846200 | -0.41957600 | 0.44420200  |
| C | -1.94629700 | 0.17570600  | 0.05169300  |
| O | -2.19854400 | 1.33384900  | 0.37002300  |
| C | -2.87781400 | -0.66410000 | -0.77773100 |
| H | -2.49372000 | -0.71708800 | -1.80795100 |
| H | -2.95224800 | -1.68850900 | -0.39022400 |
| H | -3.86452100 | -0.18939700 | -0.79042500 |

**TS6-iso**

|   |             |             |             |
|---|-------------|-------------|-------------|
| C | 1.80193200  | 1.48010500  | 0.15427000  |
| C | 0.28146400  | -0.23750700 | 0.88685600  |
| C | -0.13909800 | 1.10289400  | 1.46739600  |
| C | 0.34946000  | 1.94617800  | 0.28773500  |
| H | 2.44475400  | 1.99046400  | 0.88901300  |
| H | 2.20751300  | 1.64246600  | -0.85275500 |
| H | 0.20754200  | -1.13270400 | 1.50971800  |
| H | -1.22200600 | 1.14164000  | 1.62277800  |
| H | 0.41832900  | 1.34137300  | 2.38433900  |
| H | 0.22328800  | 3.03078700  | 0.36555900  |
| S | -0.61409200 | 1.28806100  | -1.14337300 |
| C | -0.47377800 | -0.40090000 | -0.44051400 |
| O | -0.56372200 | -1.39535700 | -1.11837100 |
| N | 1.66696800  | 0.04875500  | 0.46741900  |
| C | 2.52146300  | -0.93416900 | 0.10071600  |
| O | 2.23084300  | -2.12162600 | 0.23815400  |
| C | 3.84026000  | -0.48769100 | -0.47352800 |
| H | 3.68374700  | -0.10056600 | -1.49164300 |
| H | 4.28832600  | 0.31537900  | 0.12658900  |
| H | 4.51646700  | -1.34797500 | -0.51741000 |
| S | -2.98289300 | -0.66219900 | 0.89554600  |
| C | -3.65163400 | -0.44910100 | -0.78193300 |
| H | -2.89862400 | -0.69858500 | -1.55334500 |
| H | -4.51985300 | -1.10401700 | -0.96978000 |
| H | -3.98387400 | 0.58367100  | -0.98401300 |

**TS7**

|   |            |             |             |
|---|------------|-------------|-------------|
| C | 3.50528000 | -0.24665600 | 0.24570600  |
| C | 1.36948900 | -0.24907500 | -0.86558600 |
| C | 2.07029900 | -1.57798300 | -1.09452500 |

|   |             |             |             |
|---|-------------|-------------|-------------|
| C | 2.80138800  | -1.60706000 | 0.25076500  |
| H | 4.43203000  | -0.28790900 | -0.34852100 |
| H | 3.74300400  | 0.10943500  | 1.25615600  |
| H | 0.82916400  | 0.20684400  | -1.69921300 |
| H | 1.37280300  | -2.40909900 | -1.23528700 |
| H | 2.78061500  | -1.51783900 | -1.93106700 |
| H | 3.45982300  | -2.46111000 | 0.43920000  |
| S | 1.43327000  | -1.56270400 | 1.48751100  |
| C | 0.49440800  | -0.41625900 | 0.38971600  |
| O | -0.26605400 | 0.41702400  | 0.85284600  |
| N | 2.48887500  | 0.59246500  | -0.40863500 |
| C | 2.36685100  | 1.93637200  | -0.30447700 |
| O | 1.37452000  | 2.52525200  | -0.73250900 |
| C | 3.51201400  | 2.65901200  | 0.35309300  |
| H | 3.47953500  | 2.47813900  | 1.43825700  |
| H | 4.48128200  | 2.30171700  | -0.01930800 |
| H | 3.40820000  | 3.73288700  | 0.16551900  |
| S | -1.24394000 | -1.97362900 | -0.87618400 |
| C | -2.55687100 | -1.19094500 | 0.09917900  |
| C | -3.18042900 | 0.03968700  | -0.58458500 |
| H | -2.13761200 | -0.86467000 | 1.06590200  |
| H | -3.37666700 | -1.88873500 | 0.31892400  |
| N | -2.11293000 | 0.81488400  | -1.25343400 |
| H | -3.88362900 | -0.28037100 | -1.36460300 |
| C | -3.90374900 | 0.92087300  | 0.44699200  |
| H | -1.50576300 | 1.23355900  | -0.53000500 |
| H | -1.53218200 | 0.11859600  | -1.76973800 |
| H | -2.48174100 | 1.55046600  | -1.86214200 |
| O | -3.38167900 | 2.02595200  | 0.71172300  |
| O | -4.92701900 | 0.41929400  | 0.95687800  |

### CN5

|   |             |             |             |
|---|-------------|-------------|-------------|
| C | -3.39759000 | 0.15574900  | 0.20111800  |
| C | -1.09595700 | -0.09882900 | 0.84135900  |
| C | -1.95048600 | -1.12113700 | 1.58620900  |
| C | -2.98309800 | -1.29063400 | 0.46816800  |
| H | -4.14786500 | 0.49524100  | 0.93354800  |
| H | -3.79610300 | 0.29881200  | -0.81171100 |
| H | -0.30680000 | 0.40077500  | 1.41595600  |
| H | -1.41151200 | -2.04276900 | 1.83331300  |
| H | -2.39565800 | -0.68966100 | 2.49367900  |
| H | -3.81530300 | -1.97680600 | 0.65624200  |
| S | -1.96534500 | -1.89549800 | -0.94143200 |
| C | -0.52199500 | -0.83430500 | -0.40620500 |

|   |             |             |             |
|---|-------------|-------------|-------------|
| O | -0.12748300 | 0.00049400  | -1.41755200 |
| N | -2.11675800 | 0.85058300  | 0.39445500  |
| C | -1.87259600 | 2.14932300  | 0.12593700  |
| O | -0.77329200 | 2.66798000  | 0.32776900  |
| C | -3.03570000 | 2.93442800  | -0.42393300 |
| H | -3.27494300 | 2.58167600  | -1.43797500 |
| H | -3.93246400 | 2.80206000  | 0.19675800  |
| H | -2.76163400 | 3.99373700  | -0.46277900 |
| S | 0.82920300  | -2.01336600 | 0.11205900  |
| C | 2.35838000  | -1.13644400 | -0.34559400 |
| C | 2.64064400  | 0.20361600  | 0.33341700  |
| H | 2.38819100  | -1.01183100 | -1.43859900 |
| H | 3.14394300  | -1.85167500 | -0.06742500 |
| N | 1.80253600  | 1.26604600  | -0.22459700 |
| H | 2.45302100  | 0.09258300  | 1.41257300  |
| C | 4.15667700  | 0.52299700  | 0.18030400  |
| H | 0.63051400  | 0.59651700  | -1.03299700 |
| H | 1.33172400  | 1.80941000  | 0.49858600  |
| H | 2.42958300  | 1.90670800  | -0.71801700 |
| O | 4.46355800  | 1.58390300  | -0.40653200 |
| O | 4.94390000  | -0.32587100 | 0.65195600  |

### TS8

|   |             |             |             |
|---|-------------|-------------|-------------|
| C | 1.06230400  | 3.15686800  | 0.23891500  |
| C | -0.15043400 | 1.34292600  | -0.77043400 |
| C | 1.33858000  | 1.16265700  | -1.02535200 |
| C | 1.85054900  | 1.84322200  | 0.25046900  |
| H | 1.55164200  | 3.90961500  | -0.40085600 |
| H | 0.93663200  | 3.57521700  | 1.24592600  |
| H | -0.80172900 | 1.16921900  | -1.63861600 |
| H | 1.63757900  | 0.11142000  | -1.12437900 |
| H | 1.64481100  | 1.70732300  | -1.93124900 |
| H | 2.93546000  | 1.98902000  | 0.28589200  |
| S | 1.26679700  | 0.79371600  | 1.63176000  |
| C | -0.65476400 | 0.42255100  | 0.36588900  |
| O | -1.65824500 | 0.73261700  | 1.02979800  |
| N | -0.21960300 | 2.73057200  | -0.33992700 |
| C | -1.36236800 | 3.44401100  | -0.39594100 |
| O | -2.39735900 | 2.97890400  | -0.87943900 |
| C | -1.28975200 | 4.84559400  | 0.15049000  |
| H | -0.45567100 | 5.39978700  | -0.30210200 |
| H | -2.23471700 | 5.35895800  | -0.05544200 |
| H | -1.11966900 | 4.81386000  | 1.23665100  |
| S | -0.48478900 | -1.36698600 | -0.14350300 |

|   |             |             |             |
|---|-------------|-------------|-------------|
| C | -2.08197100 | -1.99559600 | 0.44728000  |
| C | -3.26236600 | -1.76376000 | -0.48246300 |
| H | -2.27898200 | -1.56446100 | 1.43900500  |
| H | -1.96068800 | -3.07876000 | 0.56516800  |
| N | -3.58080900 | -0.31926100 | -0.65235300 |
| H | -3.04339900 | -2.17916200 | -1.47496600 |
| C | -4.54206200 | -2.47249700 | 0.04908000  |
| H | -3.06435800 | 0.26553800  | 0.04048100  |
| H | -3.35296200 | 0.03756000  | -1.58610200 |
| H | -4.60474800 | -0.25224200 | -0.49000300 |
| O | -5.57708000 | -1.77065200 | 0.09576900  |
| O | -4.41096700 | -3.66758700 | 0.36080900  |
| H | 2.34312300  | -0.80874800 | 1.20531400  |
| O | 2.93429700  | -1.62293200 | 0.99016000  |
| P | 3.93183300  | -1.40258100 | -0.20662900 |
| O | 5.06357200  | -2.51230500 | 0.01010500  |
| O | 3.12536100  | -2.00066300 | -1.45485300 |
| O | 4.44676400  | -0.02179500 | -0.40214300 |
| H | 5.79947100  | -2.19462200 | 0.55966200  |
| H | 3.52440800  | -1.76822100 | -2.31034500 |
